# Supplementary material for: Th2 and eosinophil responses suppress inflammatory arthritis
Source: PubMed Central journal article supplement (PMC4899615; doi:10.1038/ncomms11596), 2016-06-07
Supplement: ncomms11596-s1.pdf [file ncomms11596-s1.pdf]

Fig. S1

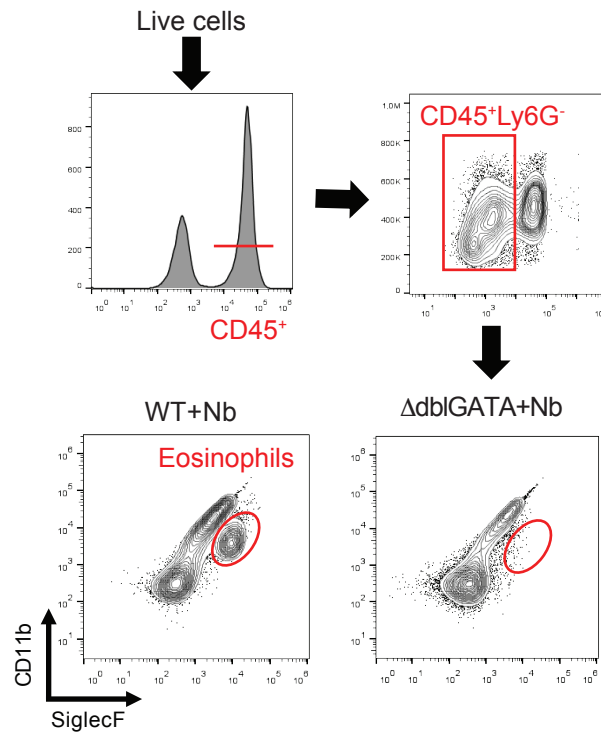

**Supplementary Figure 1.** Fluorescence activated cell scanner (FACS)- based gating strategy for identification of eosinophils in the joints. Representative contour plots are shown and staining as CD45<sup>+</sup>Ly6G<sup>-</sup>CD11b<sup>+</sup>SiglecF<sup>+</sup> cells indicated. (WT) wild-type mice; (Nb) challenge with *N. brasiliensis*; ( $\Delta$ dblGATA) eosinophil deficient mice (control).

Fig. S2

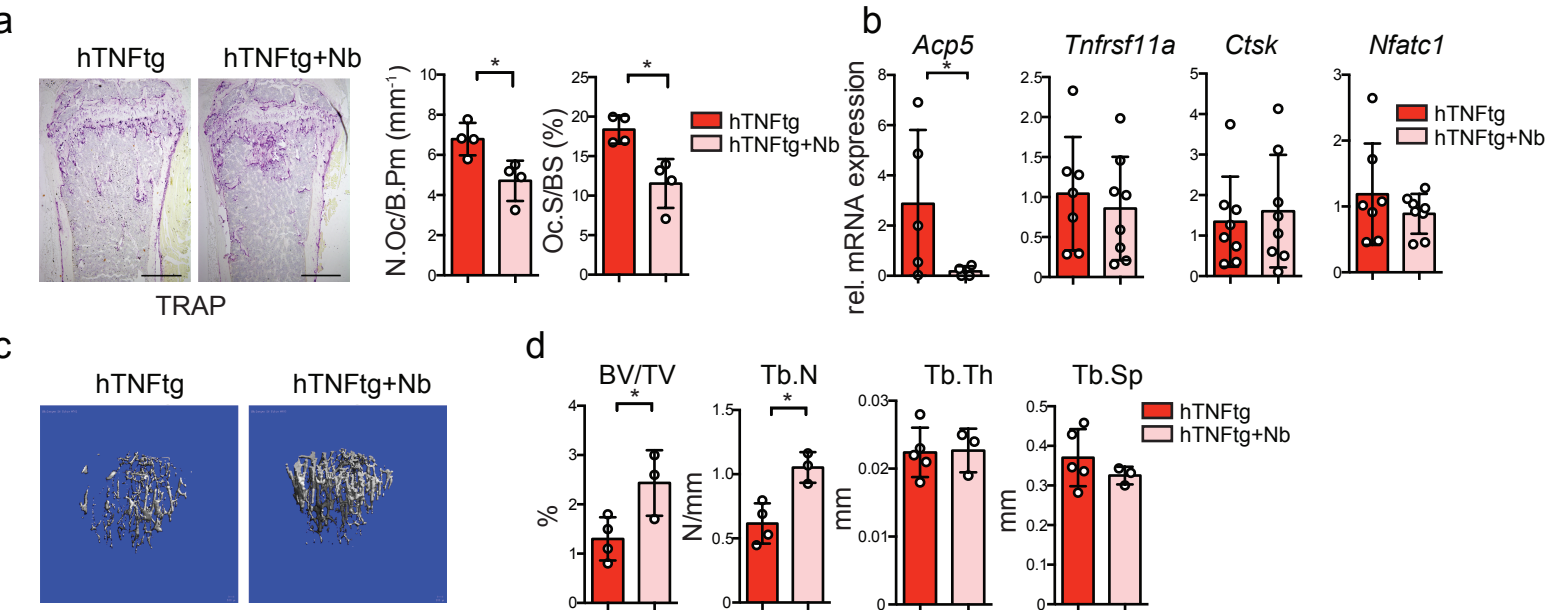

**Supplementary Figure 2.** (a) Tartrate-resistant acid phosphatase (TRAP) staining and quantification of osteoclast surface per bone surface (Oc.S/BS) and number of osteoclasts per bone perimeter (N.Oc/B.Pm) in the tibial bones of human tumor necrosis factor transgenic (hTNFtg) mice with or without *N. brasiliensis* (Nb) challenge (n=4 per group); scale bar: 500 $\mu$ m. (b) Quantitative RT-PCR analyses of *Acp5*, *Ctsk*, *Tnfrsf11a*, *Nfatc1* expression in synovial extracts of 9 week-old hTNFtg mice with or without Nb challenge (n=9 per group). (c) Representative micro-computed tomography image of the tibial bones and (d) quantification of bone microstructure in hTNFtg mice with or without Nb challenge (n=4-5 per group). BV/TV, bone volume per tissue volume; Tb.N, trabecular number; Tb.Th, trabecular thickness; Tb.Sp, trabecular separation. Scale bar: 100 $\mu$ m. Data are shown as mean  $\pm$  SEM. Asterisks mark statistically significant difference (\* $P$ <0.05 determined by Student's *t* test).

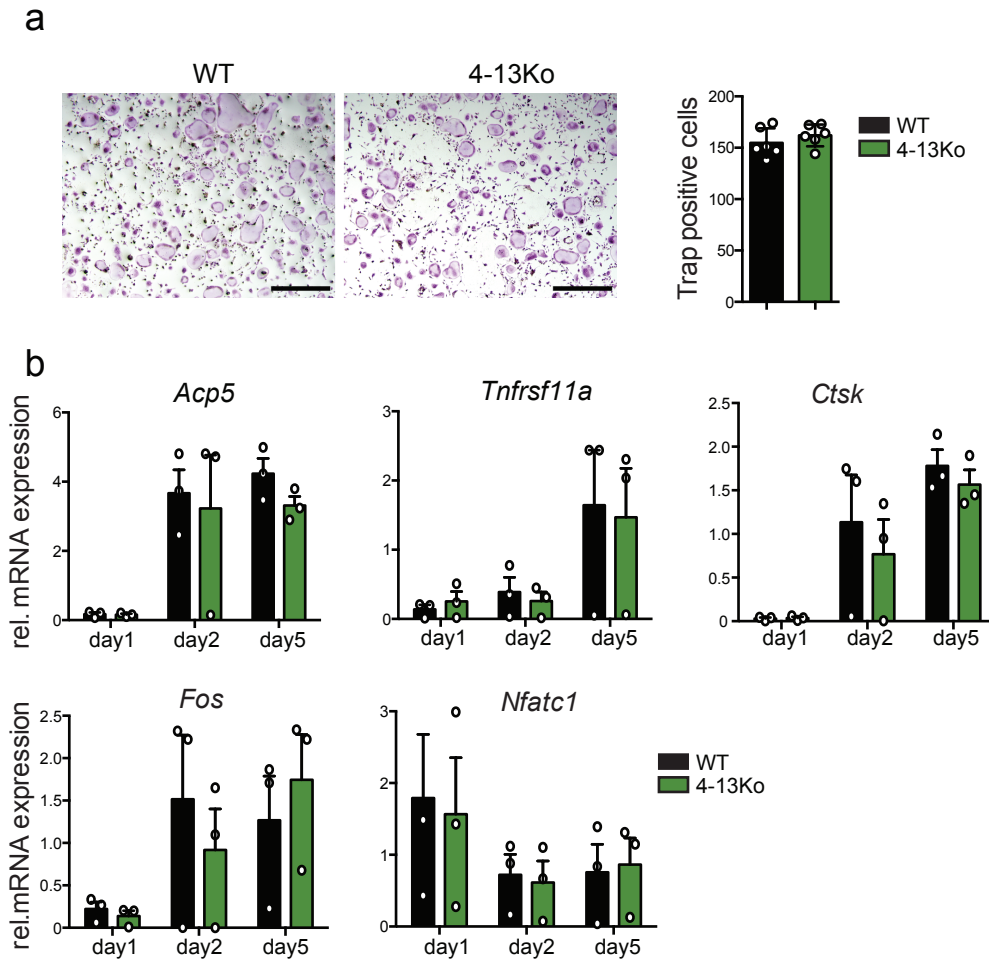

**Supplementary Figure 3.** (a) Quantification of tartrate-resistant acid phosphatase (TRAP) staining and TRAP-positive multi-nucleated osteoclasts from bone marrow monocytes of wild-type (WT) and interleukin-4/interleukin-13 double knockout mice (4-13ko). Data are pooled from two independent experiments and expressed as mean  $\pm$  SEM (n=6). (b) Quantitative RT-PCR analyses of *Acp5*, *Tnfrsf11a*, *Ctsk*, *Fos*, *Nfatc1* expression in osteoclast culture extract of WT and 4-13ko mice at the indicated time points (n=3 per group).

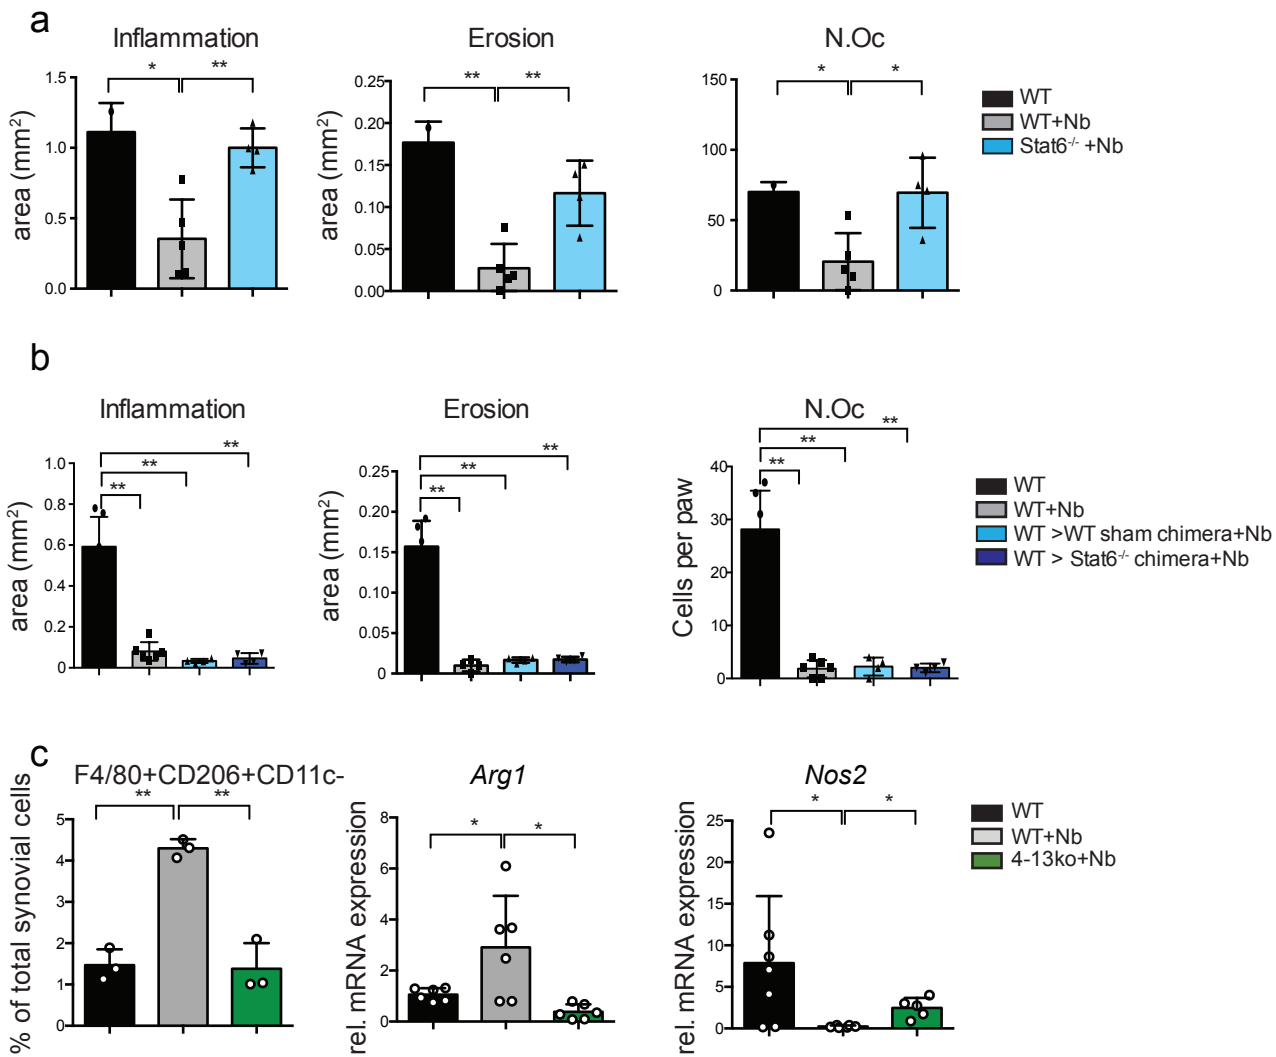

**Supplementary Figure 4.** (a) Quantification of inflammation area, erosion area and number of osteoclasts (N.Oc) per paw in the joints of unchallenged WT mice and Nb-challenged WT and *Stat6*<sup>-/-</sup> mice 7 days after serum transfer (n=3-5 per group). (b) Quantification of inflammation area, erosion area and N.Oc per paw in the joints of unchallenged WT mice and Nb- challenged WT=>WT and WT=>*Stat6*<sup>-/-</sup> chimeras 9 days after serum transfer (n=5 per group). (c) Percentage of anti-inflammatory macrophages (F4/80<sup>+</sup>CD206<sup>+</sup>CD11c<sup>-</sup>) and quantitative RT-PCR analyses of *Arg1* (encoding arginase-1) and *Nos2* (encoding inducible nitric oxide synthase) expression in the joints of unchallenged WT mice and Nb- challenged WT and interleukin-4/interleukin-13 double knockout mice (4-13ko) mice 9 days after serum transfer. Data are shown as mean ± SEM. Asterisks mark statistically significant difference (\**P*<0.05; \*\**P*<0.01; \*\*\**P*<0.001 determined by ANOVA test for multiple comparisons).

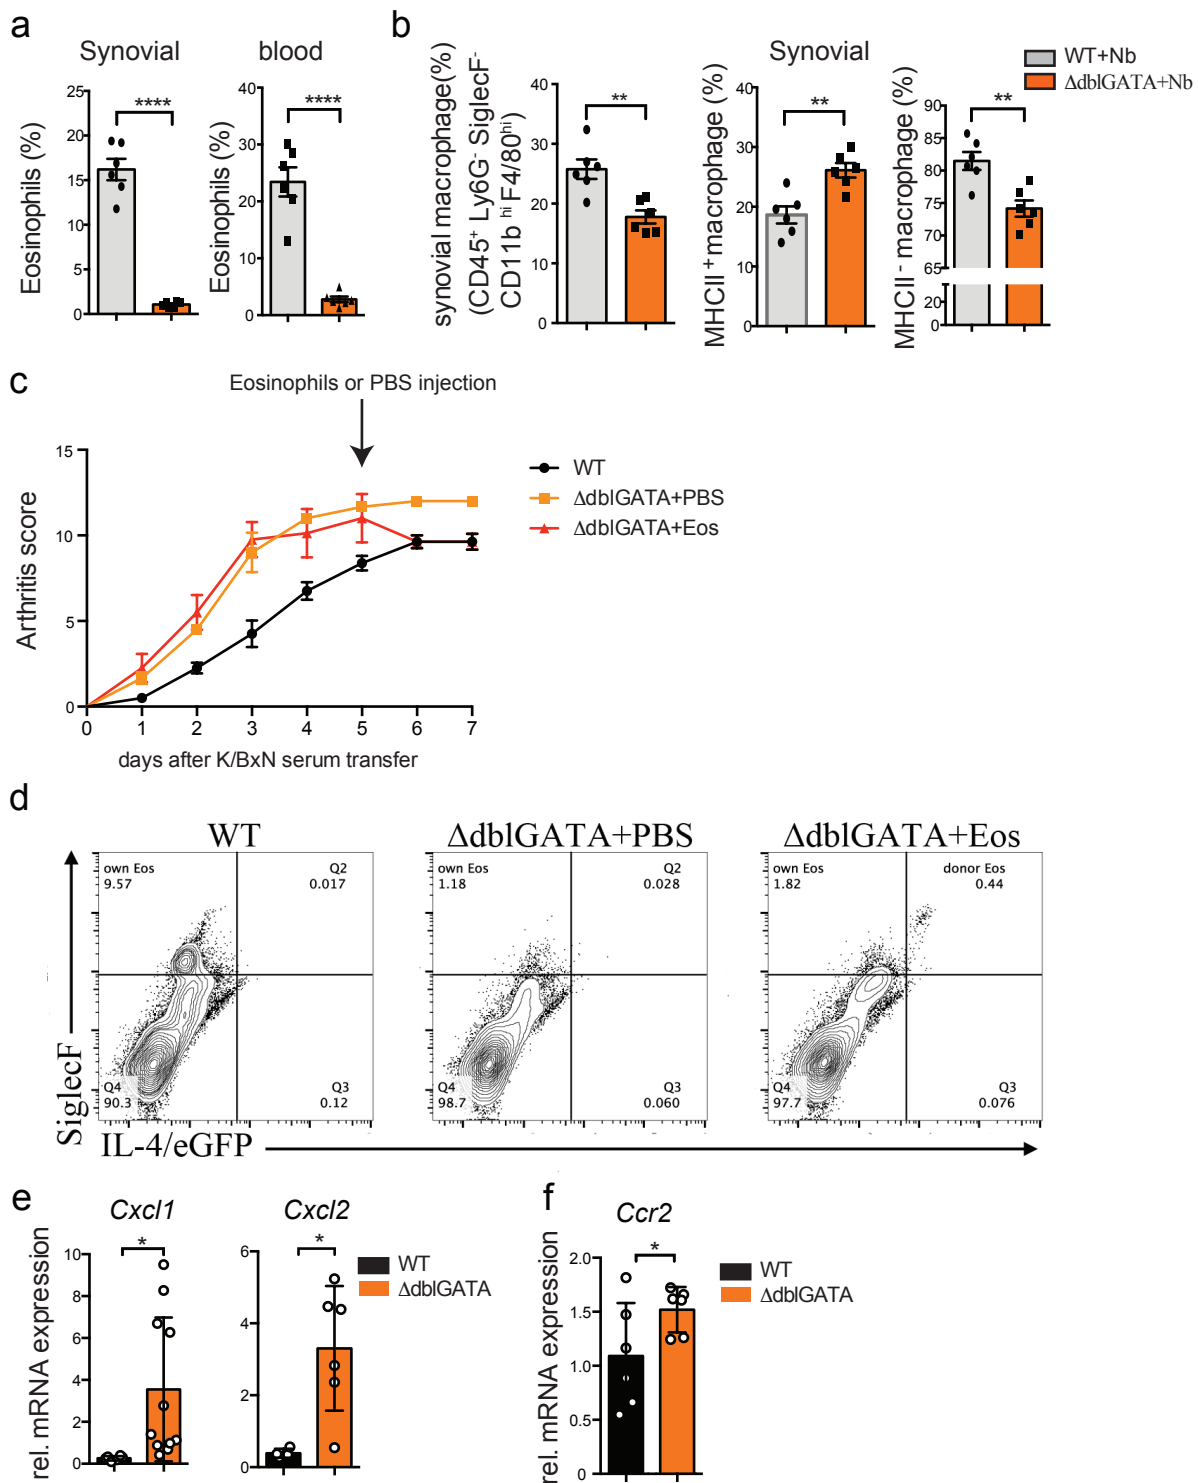

**Supplementary Figure 5.** (a) Percentage of eosinophils ( $CD45^+Ly6G^-CD11b^+SiglecF^+$ ) in the joints and in the blood of Nb-challenged wild-type (WT) and eosinophil-deficient  $\Delta dblGATA$  mice 9 days after serum transfer ( $n=6$  per group). (b) Percentage of macrophages ( $CD45^+Ly6G^-SiglecF^-CD11b^{hi}F4/80^{hi}$ ), MHC II<sup>+</sup> macrophages and MHC II<sup>-</sup> macrophages in the joints of Nb-challenged WT and  $\Delta dblGATA$  mice 9 days after serum transfer ( $n=6$  per group). (c) Arthritis scores of WT mice and  $\Delta dblGATA$  mice injected with vehicle or eosinophils at day 5 after serum transfer ( $n=6$  per group). (d) Representative contour plot showing increase of labelled donor eosinophils by flow cytometry gating on  $IL-4/eGFP^+SiglecF^+$  cells in the blood of  $\Delta dblGATA$  mice 7 days after serum transfer. (e) Quantitative RT-PCR analyses of *Cxcl1*, *Cxcl2* expression in the joints of WT and  $\Delta dblGATA$  mice ( $n=6-11$  per group). (f) Quantitative RT-PCR analyses of *Ccr2* expression in the joints of WT and  $\Delta dblGATA$  mice 9 days after serum transfer ( $n=6$  per group). (\* $P<0.05$ , \*\* $P<0.01$ , \*\*\* $P<0.001$  determined by Student's *t* test)

**Supplementary Table 1      The sequences of primers for quantitative RT-PCR**

| Number | Gene             | Forward (5'-3')                 | Reverse (5'-3')                   |
|--------|------------------|---------------------------------|-----------------------------------|
| 1      | <i>Actb</i>      | TGT CCA CCT TCC AGC AGA TGT     | AGC TCA GTA ACA GTC CGC CTA GA    |
| 2      | <i>Hprt</i>      | GTT AAG CAG TAC AGC CCC AAA     | AGG GCA TAT CCA ACA ACA AAC TT    |
| 3      | <i>Acp5</i>      | GGC CGG CCA CTA CCC CAT CT      | CAC CGT AGC CAC AAG CAG GAC TCT   |
| 4      | <i>Ctsk</i>      | AGG GCC AAC TCA AGA AGA AAA CT  | TGC CAT AGC CCA CCA CCA ACA CT    |
| 5      | <i>Tnfrsf11a</i> | GCC CAG TCT CAT CGT TCT GC      | GCA AGC ATC ATT GAC CCA ATT C     |
| 6      | <i>Nfya1</i>     | GAC CCG GAG TTC GAC TTC G       | TGA CAG TAG GGG ACA CAT AAC TG    |
| 7      | <i>Fos</i>       | CGG GTT TCA ACG CCG ACT AC      | CAG GTC TGG GCT GGT GGA GA        |
| 8      | <i>Tnf</i>       | CAC AGC CTT CCT CAC AGA GC      | GGA GGC AAC AAG GTA GAG AGG       |
| 9      | <i>Il1b</i>      | CAG GCA GGC AGT ATC ACT CA      | AGG TGC TCA TGT CCT CAT CC        |
| 10     | <i>Il6</i>       | TCC TTC CTA CCC CAA TTT CC      | GCC ACT CCT TCT GTG ACT CC        |
| 11     | <i>Il4</i>       | ATC ATC GGC ATT TTG AAC GAG GTC | ACC TTG GAA GCC CTA CAG ACG A     |
| 12     | <i>Il5</i>       | GAT GAG GCT TCC TGT CCC TAC T   | TGA CAG GTT TTG GAA TAG CAT TTC C |
| 13     | <i>Nos2</i>      | GAG ACA GGG AAG TCT GAA GCA C   | CCA GCA GTA GTT GCT CCT CTT C     |
| 14     | <i>Itgax</i>     | CTG GAT AGC CTT TCT TCT GCT G   | GCA CAC TGT GTC CGA ACT CA        |
| 15     | <i>Arg1</i>      | CTC CAA GCC AAA GTC CTT AGA G   | AGG AGC TGT CAT TAG GGA CAT C     |
| 16     | <i>Retnla</i>    | CCA TAG AGA GAT TAT CGT GGA     | TGG TCG AGT CAA CGA GTA AG        |
| 17     | <i>Chil3</i>     | TAC TCA CTT CCA CAG GAG CAG G   | CTC CAG TGT AGC CAT CCT TAG G     |
| 18     | <i>Mre1</i>      | CTC TGT TCA GCT ATT GGA CGC     | CGG AAT TTC TGG GAT TCA GCT TC    |
| 19     | <i>Cxcl1</i>     | TCC AGA GCT TGA AGG TGT TGC C   | AAC CAA GGG AGC TTC AGG GTC A     |
| 20     | <i>Cxcl2</i>     | CAT CCA GAG CTT GAG TGT GAC G   | GGC TTC AGG GTC AAG GCA AAC T     |
| 21     | <i>Ccr2</i>      | GCC AGG ACT GAG TGA GAA GG      | CAA ATG AGG TTT CCA ACA ACC       |
| 22     | <i>Il10</i>      | CGG GAA GAC AAT AAC TGC ACC C   | CGG TTA GCA GTA TGT TGT CCA GC    |

## Supplementary Table 2

### Absolute numbers Fig. 2 (a-d)

| Cell type                                                   | WT                | WT+Nb             | p-value |
|-------------------------------------------------------------|-------------------|-------------------|---------|
| Eosinophils ( $\times 10^5$ )/both ankle                    | 0,245 $\pm$ 0,035 | 0,811 $\pm$ 0,099 | 0,0007  |
| Neutrophils ( $\times 10^5$ )/both ankle                    | 0,783 $\pm$ 0,039 | 0,434 $\pm$ 0,055 | 0,0008  |
| synovial Macrophages ( $\times 10^4$ )/both ankle           | 2,315 $\pm$ 0,168 | 2,211 $\pm$ 0,259 | 0,745   |
| MHCII <sup>+</sup> Macrophages ( $\times 10^4$ )/both ankle | 0,860 $\pm$ 0,058 | 0,492 $\pm$ 0,069 | 0,0036  |
| MHCII <sup>-</sup> Macrophages ( $\times 10^4$ )/both ankle | 1,446 $\pm$ 0,129 | 1,716 $\pm$ 0,206 | 0,2974  |

**Supplementary Table 3      Synovial tissue sample list**

| Patient | Sex    | Age | Diagnose |
|---------|--------|-----|----------|
| 1       | female | 93  | OA       |
| 2       | female | 80  | OA       |
| 3       | female | 89  | OA       |
| 4       | female | 82  | OA       |
| 5       | female | 81  | OA       |
| 6       | female | 68  | OA       |
| 7       | female | 87  | OA       |
| 8       | female | 83  | OA       |
| 9       | male   | 74  | OA       |
| 10      | female | 88  | OA       |
| 11      | female | 77  | OA       |
| 12      | female | 94  | OA       |
| 13      | female | 79  | OA       |
| 14      | male   | 86  | OA       |
| 15      | female | 64  | OA       |
| 16      | female | 81  | OA       |
| 17      | female | 86  | OA       |
| 18      | female | 92  | OA       |
| 19      | female | 74  | OA       |
| 20      | female | 79  | OA       |
| 21      | male   | 81  | OA       |
| 22      | female | 87  | OA       |
| 23      | female | 42  | RA       |
| 24      | female | 59  | RA       |
| 25      | female | 83  | RA       |
| 26      | female | 75  | RA       |
| 27      | female | 56  | RA       |
| 28      | female | 47  | RA       |
| 29      | male   | 74  | RA       |
| 30      | female | 55  | RA       |
| 31      | female | 61  | RA       |
